# Supplementary material for: Easy-Prime: a machine learning–based prime editor design tool
Source: PubMed Central journal article supplement (PMC8377858; doi:10.1186/s13059-021-02458-0), 2021-08-19
Supplement: 13059_2021_2458_MOESM1_ESM.pdf [file 13059_2021_2458_MOESM1_ESM.pdf]

## **Supplementary files for: Easy-Prime: a machine learning–based prime editor design tool**

Yichao Li<sup>1\*</sup>, Jingjing Chen<sup>1,2</sup>, Shengdar Tsai<sup>1</sup> and Yong Cheng<sup>1,3\*</sup>

<sup>1</sup>Department of Hematology, St. Jude Children’s Research Hospital, Memphis, Tennessee, USA

<sup>2</sup>Integrated Biomedical Sciences Program, University of Tennessee Health Science Center, Memphis, TN, USA

<sup>3</sup>Department of Computational Biology, St. Jude Children’s Research Hospital, Memphis, TN, USA

\* To whom correspondence should be addressed. Email: [Yichao.Li@stjude.org](mailto:Yichao.Li@stjude.org), [Yong.Cheng@stjude.org](mailto:Yong.Cheng@stjude.org)

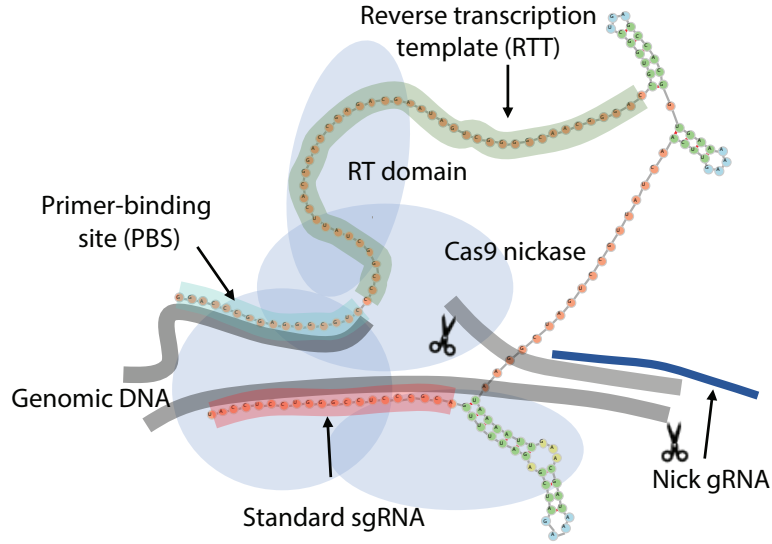

**Supplementary Figure 1. The components of a prime editor (PE).** PE consists of a Cas9 nickase fused with reverse transcriptase (blue bubble) and a pegRNA. The pegRNA sequence contains a standard sgRNA (red curve), a primer-binding site (PBS, cyan curve) that primes the RT reaction, and a reverse-transcription template (RTT, green curve) that copies the desired edit. Another standard sgRNA, called nick gRNA (blue curve), can nick the non-edited strand to further increase the editing efficiency. Grey lines are DNA at the targeted locus.

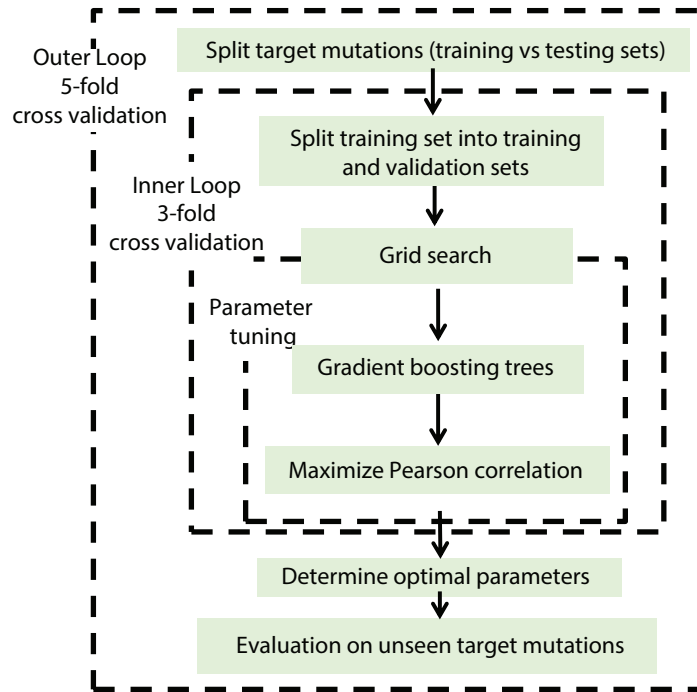

**Supplementary Figure 2. Nested cross-validation framework.** The outer cross-validation loop randomly split the data into 5 folds, of which 4 folds were used for training and the remaining fold was used for testing. Then, for each training set, the optimal parameters were determined using the inner loop, which was another 3-fold cross-validation consisting of a grid search of parameters. The final reported Pearson correlation was the mean Pearson correlation from the outer 5-fold cross-validation. For reporting, both Spearman and Pearson correlation were calculated.

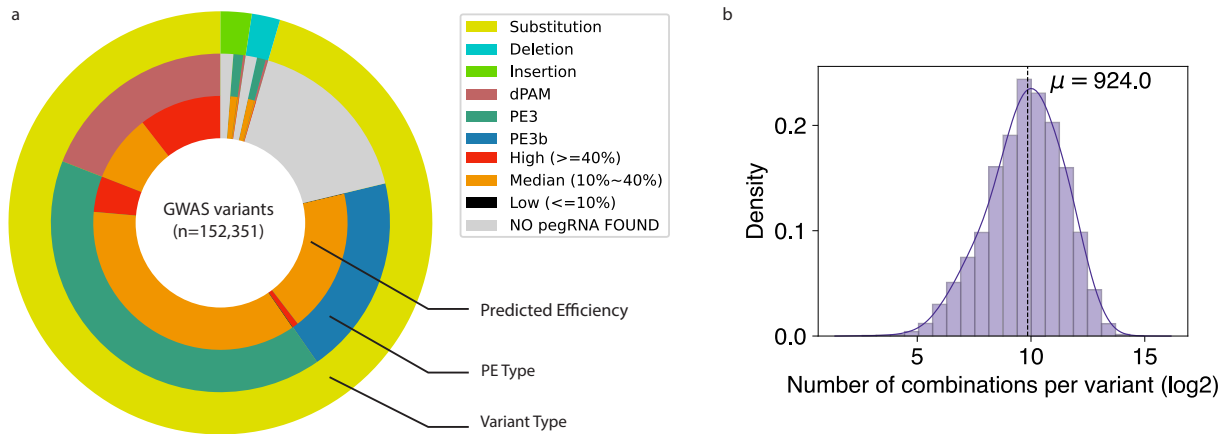

**Supplementary Figure S3. Easy-Prime GWAS application. a,** A nested pie-chart showing the prime editors (PEs) for GWAS variants designed by Easy-Prime. The outer layer represents the different variant types: substitution, deletion, and insertion. The middle layer represents the PE types: PAM disruption (dPAM), PE3, and PE3b. The inner layer represents the predicted efficiency: high ( $\geq 40\%$ ), median (between 10% and 40%), and low ( $\leq 10\%$ ). **b,** Histogram showing the distribution of the numbers of optimized sets of pegRNA and ngRNA per variant. Average number is 924.

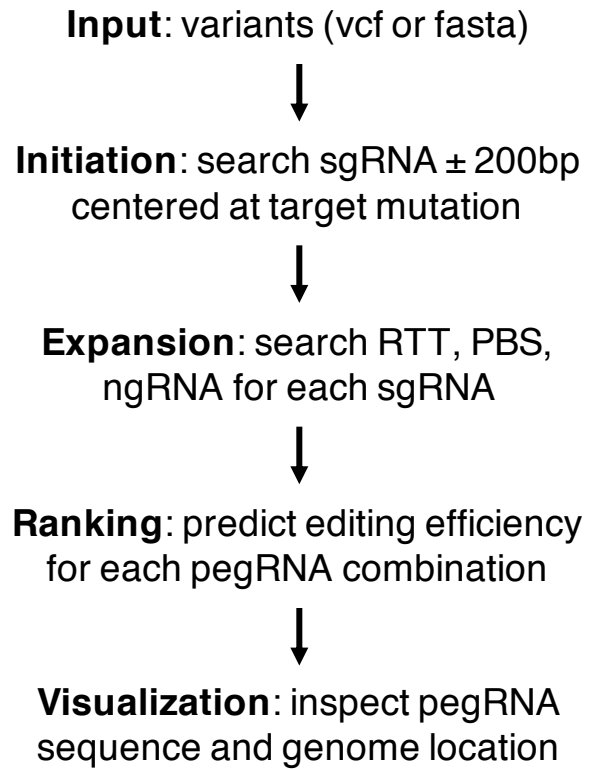

Supplementary Figure S4. Easy-Prime PE design steps.
